# Supplementary material for: Detecting N-myristoylation and S-acylation of host and pathogen proteins in plants using click chemistry
Source: PubMed Central journal article supplement (PMC4972946; doi:10.1186/s13007-016-0138-2), 2016-08-03

Figure S2

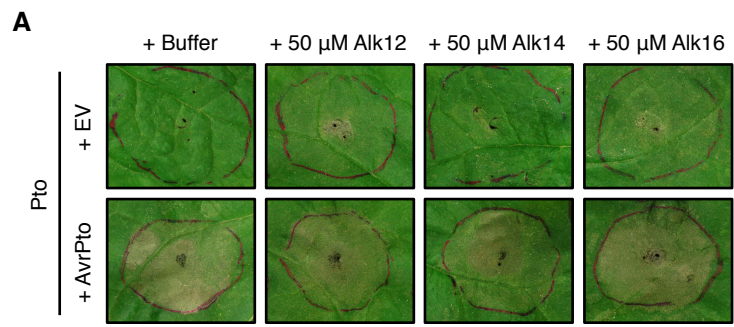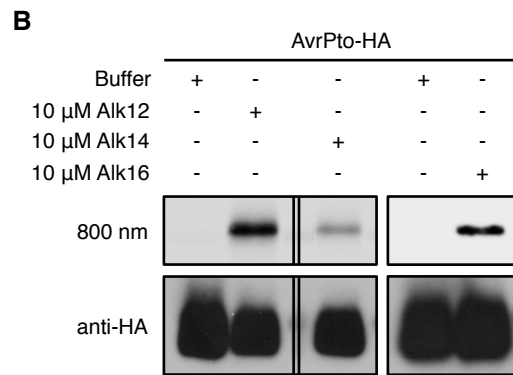

Supplement: 13007_2016_138_MOESM2_ESM.pdf [file 13007_2016_138_MOESM2_ESM.pdf]
