# Supplementary material for: Detecting N-myristoylation and S-acylation of host and pathogen proteins in plants using click chemistry
Source: PubMed Central journal article supplement (PMC4972946; doi:10.1186/s13007-016-0138-2), 2016-08-03
Supplement: 13007_2016_138_MOESM4_ESM.pdf [file 13007_2016_138_MOESM4_ESM.pdf]

Figure S4

A

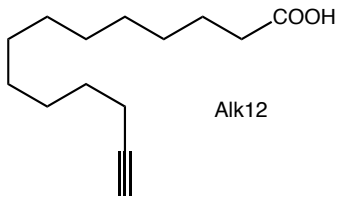

Alk12

B

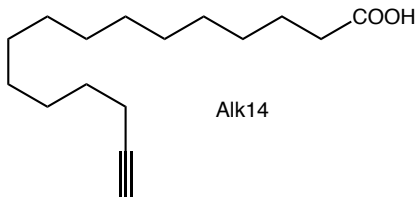

Alk14

C

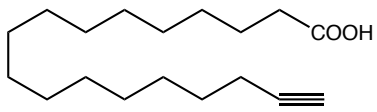

Alk16

D

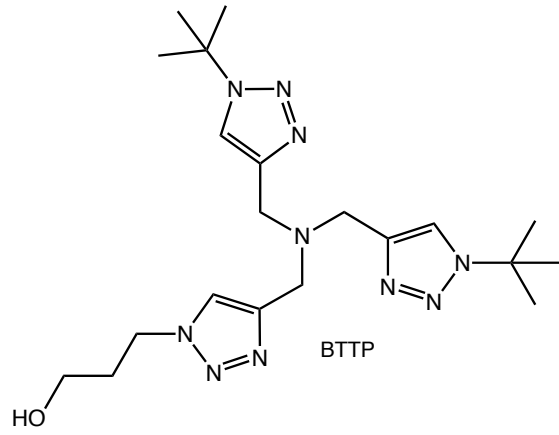

BTPP
