# Supplementary material for: Detecting N-myristoylation and S-acylation of host and pathogen proteins in plants using click chemistry
Source: PubMed Central journal article supplement (PMC4972946; doi:10.1186/s13007-016-0138-2), 2016-08-03
Supplement: 13007_2016_138_MOESM5_ESM.pdf [file 13007_2016_138_MOESM5_ESM.pdf]

**Table S1.** Vectors and plasmids used in this study.

| Vector     | Insert                       | Identifier | Purpose/description                                                                 | Source    |
|------------|------------------------------|------------|-------------------------------------------------------------------------------------|-----------|
| pJLSmart   | -                            | -          | Gateway entry vector                                                                | [89]      |
| pJLSmart   | AvrPto [no stop]             | pPB2       | For LR recombination into destination vectors                                       | This work |
| pJLSmart   | AvrPto (G2A) [no stop]       | pPB105     | For LR recombination into destination vectors                                       | This work |
| pJLSmart   | FLS2 [no stop]               | pJM379     | For LR recombination into destination vectors                                       | This work |
| pJLSmart   | FLS2 (C830S,C831S) [no stop] | pPB153     | For LR recombination into destination vectors                                       | This work |
| pJM51      | -                            | -          | Modified pJLSmart Gateway entry vector with Shine-Dalgarno sequence                 | [90]      |
| pJM51      | YFP [no stop]                | pSS22      | For LR recombination into destination vectors                                       | This work |
| HBT95-HA   | -                            | -          | Gateway destination vector for protoplast expression with C-terminal 2x HA tag      | [66]      |
| HBT95-HA   | FLS2                         | pSS122     | Generating C-terminal HA fusion                                                     | This work |
| HBT95-HA   | FLS2 (C830S,C831S)           | pPB154     | Generating C-terminal HA fusion                                                     | This work |
| HBT95-FLAG | -                            | -          | Gateway destination vector for protoplast expression with C-terminal FLAG tag       | [66]      |
| HBT95-FLAG | YFP                          | pSS298     | Generating C-terminal FLAG fusion                                                   | This work |
| pGWB411    | -                            | -          | Binary gateway destination vector for plant transformation with C-terminal FLAG tag | [91]      |
| pGWB411    | YFP                          | pSS190     | Generating C-terminal FLAG fusion                                                   | This work |
| pGWB541    | -                            | -          | Binary gateway destination vector for plant transformation with C-terminal eYFP tag | [91]      |
| pGWB541    | AvrPto                       | pSS349     | Generating C-terminal eYFP fusion                                                   | This work |
| pGWB541    | AvrPto (G2A)                 | pSS350     | Generating C-terminal eYFP fusion                                                   | This work |
| pBTEX      | -                            | -          | Binary expression vector for plant transformation                                   | [92]      |
| pBTEX      | AvrPto-HA                    | -          | Binary expression vector for plant transformation                                   | [93]      |
| pBTEX      | Pto-HA                       | -          | Binary expression vector for plant transformation                                   | [93]      |
| pBTEX      | Pto-YFP                      | -          | Binary expression vector for plant transformation                                   | This work |
| pBTEX      | Pto (G2A)-YFP                | -          | Binary expression vector for plant transformation                                   | This work |

66. He P, Shan L, Lin N-C, Martin GB, Kemmerling B, Nürnberger T, et al. Specific bacterial suppressors of MAMP signaling upstream of MAPKKK in *Arabidopsis* innate immunity. *Cell*. 2006;125:563–75.

89. Mathieu J, Warthmann N, Küttner F, Schmid M. Export of FT protein from phloem companion cells is sufficient for floral induction in *Arabidopsis*. *Curr Biol*. 2007;17:1055–60.

90. Cheng W, Munkvold KR, Gao H, Mathieu J, Schwizer S, Wang S, et al. Structural analysis of *Pseudomonas syringae* AvrPtoB bound to host BAK1 reveals two similar kinase-interacting domains in a type III effector. *Cell Host Microbe*. 2011;10:616–26.

91. Nakagawa T, Suzuki T, Murata S, Nakamura S, Hino T, Maeo K, et al. Improved Gateway binary vectors: high-performance vectors for creation of fusion constructs in transgenic analysis of plants. *Biosci Biotechnol Biochem*. 2007;71:2095–100.

92. Frederick RD, Thilmony RL, Sessa G, Martin GB. Recognition specificity for the bacterial avirulence protein AvrPto is determined by Thr-204 in the activation loop of the tomato Pto kinase. *Mol Cell*. 1998;2:241–5.

93. Abramovitch RB, Kim Y-J, Chen S, Dickman MB, Martin GB. *Pseudomonas* type III effector AvrPtoB induces plant disease susceptibility by inhibition of host programmed cell death. *EMBO J*. 2003;22:60–9.
